# Supplementary material
Source: ML conference proceedings conference paper supplement (https://proceedings.mlr.press/v189/sundaray23a.html)
Supplement: Supplementary file [file sundaray23a-supp.pdf]

# Supplementary: Auto-Physics-Encoder: Using Physics-Informed Latent Layer Two-Way Physics Flow for Monitoring Systems with Unobservability

**Priyabrata Sundaray**

*Arizona State University, Tempe, AZ, USA*

SUNDARAY@ASU.EDU

**Yang Weng**

*Arizona State University, Tempe, AZ, USA*

YANG.WENG@ASU.EDU

**Editors:** Emtiyaz Khan and Mehmet Gonen

## 1. Reproducibility Table:

Table 1. List of Hyper-Parameters for the Model-X.

| Hyper-Parameter             | Description                  | Selected Value              |
|-----------------------------|------------------------------|-----------------------------|
| Number of repetitions       | Maximum iterations           | 400                         |
| Step size tolerance         | Termination criteria         | $1e^{-6}$                   |
| Function value tolerance    | Termination criteria         | $1e^{-6}$                   |
| Random number generator     | Random state                 | Seed                        |
| Criterion                   | Performance metric           | Mean Squared Error          |
| Performance comparison      | Comparison metric            | System parameter estimation |
| Data normalization          | Normalize                    | [-1, +1]                    |
| Training:Testing:Validation | Percentage split             | 70:15:15                    |
| Neural network Depth        | Number of hidden layers      | 5                           |
| Hidden layer size           | Number of hidden nodes       | $\mathcal{O}(k)$            |
| Activation Function         | ReLU                         | $f(a) = a^+ = \max(0, a)$   |
| Optimization Algorithm      | Solver                       | Levenberg-Marquardt         |
| Unobservability range       | Number of unobservable nodes | [10%, 50%]                  |
| Penalty Multiplier          | $\beta$                      | 1                           |
| Library function order      | Symbolic Regression          | 2                           |
